# Supplementary material for: An Exclusively Skewed Distribution of Pediatric Immune Reconstitution Inflammatory Syndrome Toward the Female Sex Is Associated With Advanced Acquired Immune Deficiency Syndrome
Source: Front Pediatr. 2019 Jul 10;7:293. doi: 10.3389/fped.2019.00293 (PMC6635464; doi:10.3389/fped.2019.00293)
Supplement: Supplementary Table S2 — PubMed-based compilation of IRIS-related infectious events in children and adolescents infected with HIV (January 1st, 1979 through August 30th, 2018). [file Table_2.XLSX]

## Sheet: README
An Exclusively Skewed Distribution of Pediatric Immune Reconstitution Inflammatory Syndrome Toward the Female Sex is Associated with Advanced Acquired Immune Deficiency Syndrome
Regina Célia de Souza Campos Fernandes, Thaís Louvain de Souza, Thiago da Silva Barcellos, Enrique Medina- Acosta
Supplementary Material
Table S2. PubMed-based compilation of IRIS-related infectious events in children and adolescents infected with HIV (January 1st, 1979 through August 30th, 2018).

## Sheet: Table S2 AMENDED
Reference	Age a	Sex	IRIS-related infectious event	Country	ART timing b	Viral load	CD4 count	Viral load	CD4 count	Fatal outcome
(Sharp and Mallon, 1998)	8 months	Male	BCGitis	Australia	2	4.4x106	0.1	7.7x104	0.26	No
(Bonkowsky et al., 2002)	12	Male	Chronic vascular infection	USA	20	NI c	50	<50	257	No
(Viani, 2002)	13	Male	Sarcoidosis	USA	32	750,000	5 cells/uL	<25 copies/mL	441 cells/mL	No
(Hesseling et al., 2003)	9 months	Female	BCGitis	South Africa	3	NI	NI	43,000	0.1	No
(Nuttall et al., 2004)	12	Male	Progressive multifocal leukoencephalopathy	South Africa	5	96,000	12,000	Undetectable	49,000	No
(van Toorn et al., 2005)	21 months	Female	Opsoclonus-myoclonus	South Africa	2	NI	249 (3.5%)	7,702	1,055	Yes
(Puthanakit et al., 2005)	9	Female	BCGitis	Thailand	4	Log 5.88	0	Log 2.21	0.02	No
(Puthanakit et al., 2005)	8	Female	BCGitis	Thailand	10	Log 5.88	0.01	Log 2.53	0.07	No
(Puthanakit et al., 2005)	8	Female	BCGitis	Thailand	4	Log 4.38	0.03	Log 1.87	0.06	No
(Puthanakit et al., 2005)	10 months	Female	BCGitis	Thailand	8	Log 5.88	0.13	Log 3.73	0.24	No
(Kroidl et al., 2006)	18 months	Male	BCGitis	Germany	20	354,607	23,000	708	322,000	No
(Narendran et al., 2006)	12	Male	Tuberculosis	India	<1	NI	51,000	NI	225,000	No
(Siberry and Tessema, 2006)	9	Male	BCGitis	Ethiopia	1	122,000	9.6% (582)	NI	716	No
(Puthanakit et al., 2006a)	6	Female	Mycobacterium avium	Thailand	2	Log 5.56	0.04	Log 1.70	0.05	No
(Puthanakit et al., 2006a)	7	Male	Mycobacterium avium	Thailand	2	Log 5.47	0.01	Log 2.60	0.04	No
(Puthanakit et al., 2006a)	7	Male	Mycobacterium avium	Thailand	5	NI	0.01	Log 4.78	0.09	No
(Puthanakit et al., 2006a)	9	Female	Mycobacterium avium and Herpes labialis	Thailand	26	Log 5.57	0.06	Log 1.70	0.19	Yes
(Puthanakit et al., 2006a)	10	Male	Mycobacterium scrofulaceum	Thailand	2	Log 5.02	0	Log 1.70	0.02	No
(Puthanakit et al., 2006a)	11	Male	Mycobacterium scrofulaceum	Thailand	2	Log 4.86	0	NI	0.07	Yes
(Puthanakit et al., 2006a)	9	Female	Mycobacterium scrofulaceum	Thailand	3	Log 5.40	0.02	Log 2.22	0.08	No
(Puthanakit et al., 2006a)	8	Male	Mycobacterium kansasii	Thailand	3	Log 5.50	0	Log 2.60	0.05	No
(Puthanakit et al., 2006a)	7	Male	Mycobacterium simiae	Thailand	18	NI	0	NI	0.17	No
(Puthanakit et al., 2006a)	5	Female	Mycobacterium tuberculosis	Thailand	12	Log 5.88	0.02	Log 1.70	0.06	No
(Puthanakit et al., 2006a)	12	Male	Mycobacterium tuberculosis	Thailand	16	NI	0.04	Log 1.70	0.14	No
(Puthanakit et al., 2006a)	3	Male	Mycobacterium tuberculosis	Thailand	31	Log 5.88	0.03	Log 2.09	0.11	No
(Puthanakit et al., 2006a)	8	Female	BCGitis	Thailand	3	Log 4.38	0.03	Log 1.87	0.06	No
(Puthanakit et al., 2006a)	8	Female	BCGitis	Thailand	4	Log 5.88	0	Log 2.21	0.02	No
(Puthanakit et al., 2006a)	6	Male	Dermatomal Varicella-Zoster Virus	Thailand	2	Log 5.22	0.01	Log 2.58	0.03	No
(Puthanakit et al., 2006a)	6	Female	Dermatomal Varicella-Zoster Virus	Thailand	2	Log 5.33	0.03	Log 2.45	0.1	No
(Puthanakit et al., 2006a)	14	Female	Dermatomal Varicella-Zoster Virus	Thailand	4	Log 4.82	0.02	Log 1.70	0.05	No
(Puthanakit et al., 2006a)	6	Female	Dermatomal Varicella-Zoster Virus	Thailand	6	Log 5.65	0.03	Log 2.36	0.08	No
(Puthanakit et al., 2006a)	10	Female	Dermatomal Varicella-Zoster Virus	Thailand	15	NI	0	NI	0.08	No
(Puthanakit et al., 2006a)	6	Female	Dermatomal Varicella-Zoster Virus	Thailand	21	Log 4.82	0.02	Log 2.39	0.06	No
(Puthanakit et al., 2006a)	5	Female	HSV labialis	Thailand	2	Log 5.24	0.06	Log 2.83	0.17	No
(Puthanakit et al., 2006a)	10	Female	HSV labialis	Thailand	4	Log 5.43	0.15	Log 1.88	0.14	No
(Puthanakit et al., 2006a)	11	Male	HSV labialis	Thailand	18	Log 5.88	0	Log 2.63	0.07	No
(Puthanakit et al., 2006a)	7	Female	HSV labialis	Thailand	31	Log 5.88	0.02	Log 2.20	0.15	No
(Puthanakit et al., 2006a)	11	Female	HSV encephalitis	Thailand	18	Log 5.09	0.02	Log 1.70	0.03	Yes
(Puthanakit et al., 2006a)	8	Male	Cryptococcal meningitis	Thailand	2	Log 5.17	0.12	Log 2.19	0.19	No
(Puthanakit et al., 2006a)	15	Female	Cryptococcal meningitis	Thailand	2	Log 5.76	0.05	Log 2.56	0.11	No
(Puthanakit et al., 2006a)	10	Female	Cryptococcal meningitis	Thailand	7	Log 4.80	0.01	Log 1.70	0.1	No
(Puthanakit et al., 2006a)	2	Female	Guillain-Barré syndrome	Thailand	3	Log 5.88	0.12	Log 3.48	0.26	No
(Puthanakit et al., 2006b)	10	Male	Nontuberculous mycobacterial disease	Thailand	2	Log 5.02	0	Log 1.7	0.02	Yes
(Puthanakit et al., 2006b)	11	Male	Nontuberculous mycobacterial disease	Thailand	2	Log 4.86	0	NI	0.07	Yes
(Puthanakit et al., 2006b)	6	Female	Nontuberculous mycobacterial disease	Thailand	2	Log 5.56	0.04	Log 1.70	0.05	No
(Puthanakit et al., 2006b)	8	Male	Nontuberculous mycobacterial disease	Thailand	3	Log 5.50	0	Log 2.60	0.05	No
(Puthanakit et al., 2006b)	9	Female	Nontuberculous mycobacterial disease	Thailand	3	Log 5.40	0.02	Log 2.22	0.08	No
(Puthanakit et al., 2006b)	7	Male	Nontuberculous mycobacterial disease	Thailand	5	NI	0.01	Log 4.78	0.09	No
(Puthanakit et al., 2006b)	9	Female	Nontuberculous mycobacterial disease	Thailand	26	Log 5.57	0.06	Log 1.70	0.19	Yes
(Puthanakit et al., 2006b)	7	Male	Nontuberculous mycobacterial disease	Thailand	10	Log 5.47	0.01	Log 2.60	0.04	No
(Puthanakit et al., 2006b)	7	Male	Nontuberculous mycobacterial disease	Thailand	23	NI	0	NI	0.17	No
(Puthanakit et al., 2007)	3	Male	Cryptococcal meningitis	Thailand	7	Log 5.33	0.01	NI	NI	Yes
(Puthanakit et al., 2007)	6 months	Male	CMV retinitis and colitis	Thailand	9	Log 5.88	0.11	NI	NI	Yes
(Puthanakit et al., 2007)	11	Female	CMV retinitis	Thailand	22	Log 5.09	0.02	NI	NI	Yes
(Puthanakit et al., 2007)	9	Female	Mycobacterium avium complex	Thailand	26	Log 5.02	0	NI	NI	Yes
(Steenhoff et al., 2007)	13	Male	Cutaneous Mycobacterium avium	USA	8	>100,000 copies/mL	0.01	<50 copies/mL	0.08	No
(Dunkley-Thompson et al., 2008)	7 months	Male	BCGitis	Jamaica	3	NI	0.4	NI	0.407	No
(Dunkley-Thompson et al., 2008)	7 months	Male	BCGitis	Jamaica	6	NI	0.16	NI	0.437	No
(Dunkley-Thompson et al., 2008)	9 months	Female	BCGitis	Jamaica	4	NI	0.43	NI	0.536	No
(Innes et al., 2009)	8 months	Female	Tuberculosis	South Africa	20	43,200	908	Undetectable	1,214	No
(Oberdorfer et al., 2009)	9	Male	Progressive multifocal leukoencephalopathy	Thailand	14	185,976	4,000	3,220	30,000	No
(Fernandes et al., 2009; Fernandes and Medina-Acosta, 2010)	5 months	Female	BCGitis	Brazil	4	750,000 copies/mL	NI	30000 copies/mL	0.535	No
(Fernandes et al., 2009; Fernandes and Medina-Acosta, 2010)	7 months	Female	BCGitis	Brazil	6	5,130,000 copies/mL	0.133	1,410 copies/mL	0.297	No
(Fernandes et al., 2009; Fernandes and Medina-Acosta, 2010)	6 months	Female	BCGitis	Brazil	3	1,200,000 copies/mL	0.272	11,400 copies/mL	0.3	No
(Wang et al., 2009)	5	Male	Varicella Zoster Virus	Peru	2	Log 5.90	346 (10%)	Log <2.60	770 (14%)	No
(Wang et al., 2009)	7	Female	Varicella Zoster Virus	Peru	2	Log 5.28	318 (14%)	Log <2.60	457 (22%)	No
(Wang et al., 2009)	10	Male	Varicella Zoster Virus	Peru	6	Log 6.45	2 (0%)	Log 4.81	140 (5%)	No
(Wang et al., 2009)	9	Female	Varicella Zoster Virus	Peru	7	Log 5.29	9 (1%)	Log 4.94	165 (8%)	No
(Wang et al., 2009)	5	Female	Varicella Zoster Virus	Peru	11	Log 4.52	334 (8%)	Log <2.60	539 (42%)	No
(Wang et al., 2009)	9	Female	Varicella Zoster Virus	Peru	22	Log 5.57	40 (6%)	Log <2.60	276 (15%)	No
(Wang et al., 2009)	8 months	Female	Mycobacterium tuberculosis	Peru	2	Log 5.88	158 (7%)	Log 5.55	460 (7%)	No
(Wang et al., 2009)	10 months	Male	Mycobacterium tuberculosis	Peru	5	Log 6.05	297 (2%)	Log 3.00	2,000 (15%)	No
(Wang et al., 2009)	10	Male	Mycobacterium tuberculosis	Peru	6	Log 5.20	59 (2%)	Log <2.60	391 (15%)	No
(Wang et al., 2009)	1	Male	Mycobacterium tuberculosis	Peru	6	Log 5.75	826 (18%)	Log 3.91	1,063 (11%)	No
(Wang et al., 2009)	11	Female	Mycobacterium tuberculosis	Peru	28	Log 6.26	40 (1%)	Log 5.45	1,226 (17%)	No
(Wang et al., 2009)	1	Female	BCGitis	Peru	32	Log 5.97	69 (2%)	Log 4.68	900 (14%)	No
(Wang et al., 2009)	10	Male	HSV labialis	Peru	2	Log 3.76	2 (0%)	Log <2.60	10 (1%)	No
(Wang et al., 2009)	6	Female	HSV labialis	Peru	6	Log 5.70	43 (2%)	Log 4.19	128 (3%)	No
(Wang et al., 2009)	6	Female	HSV labialis	Peru	27	Log 5.72	55 (1%)	Log <2.60	291 (11%)	No
(Wang et al., 2009)	6	Female	HSV labialis	Peru	28	Log 5.35	103 (8%)	Log 4.74	285 (12%)	No
(Wang et al., 2009)	3	Male	HSV labialis	Peru	30	Log 4.95	1591 (14%)	Log 3.80	1,733 (24%)	No
(Wang et al., 2009)	4	Male	HSV labialis	Peru	34	Log 5.74	4 (0%)	Log 4.05	248 (5%)	No
(Hatherill and Flisher, 2009)	9	Female	Delirium	South Africa	3	NI	9 cells/µL (0.08%)	NI	NI	No
(Hatherill and Flisher, 2009)	9	Female	Delirium	South Africa	<8	NI	77 cell/µL (1.4%)	NI	NI	No
(Hatherill and Flisher, 2009)	11	Female	Delirium/Tuberculosis	South Africa	4	NI	25 cell/µL (0.86%)	NI	175 cell/µL	Yes
(Koppel et al., 2010)	4 months	Male	BCGitis	Germany	8	NI	583	NI	NI	NI
(Koppel et al., 2010)	9 months	Female	BCGitis	Germany	12	NI	NI	NI	NI	NI
(Koppel et al., 2010)	NI	NI	BCGitis	Germany	11	NI	NI	NI	NI	NI
(Rabie et al., 2010)	3	Male	Mycobacterium tuberculosis	England	1.5	Log 5.6	0.026	NI	NI	No
(Van der Linden et al., 2010)	8 months	Female	Hepatitis B	South Africa	6	690,000 copies/mL	0.0078	13,000	0.066	Yes
(de Carvalho et al., 2010)	11	Female	Molluscum Contagiosum	Brazil	12	Log 6.8	112	Log 2.8	1,069	No
(Ramdial et al., 2011)	9	Male	Cryptococcosis in kidney	South Africa	10	4,300 copies/mL	225 cells/mm3	<25 copies/mL	419 cells/mm3	No
(Ramdial et al., 2011)	7	Female	Cryptococcosis in kidney	South Africa	15	3,300 copies/mL	80 cells/mm3	<25 copies/mL	62 cells/mm3	No
(Gamero et al., 2012)	4 months	Male	BCGitis	Spanish	3	10,000	696	NI	NI	No
(Sudjaritruk et al., 2012)	14	Female	Penicillium marneffei	Thailand	8	NI	7.2% (39 cell/mm3)	<50 copies/mL	11% (51 cells/mL)	No
(van Toorn et al., 2012)	10	Female	Neurotuberculosis	South Africa	1	NI	55 (7%)	NI	171 (11.7%)	Yes
(van Toorn et al., 2012)	12	Male	Neurotuberculosis	South Africa	1	NI	274	NI	90 (8.3%)	No
(van Toorn et al., 2012)	14	Female	Neurotuberculosis	South Africa	<1	NI	NI	27 copies/mL	61 (11.2%)	No
(van Toorn et al., 2012)	21 months	Female	Neurotuberculosis	South Africa	3	NI	NI	NI	1,496 (33%)	No
(Lankisch et al., 2012)	5 months	NI	Nephrotic syndrome	Germany	4	>20,000,000 copies/mL	534 cells/µL (18%)	61,872 copies/mL	781 cells/µL	No
(Miranda-Choque et al., 2012)	9 months	NI	BCGitis	Peru	4	NI	NI	NI	NI	No
(Miranda-Choque et al., 2012)	13 months	NI	BCGitis	Peru	4	NI	NI	NI	NI	No
(Miranda-Choque et al., 2012)	6 months	NI	BCGitis	Peru	10	NI	NI	NI	NI	No
(Miranda-Choque et al., 2012)	4 months	NI	BCGitis	Peru	3	NI	NI	NI	NI	No
(Miranda-Choque et al., 2012)	5 months	NI	BCGitis	Peru	7	NI	NI	NI	NI	No
(Miranda-Choque et al., 2012)	7 months	NI	BCGitis	Peru	4	NI	NI	NI	NI	No
(Miranda-Choque et al., 2012)	6 months	NI	BCGitis	Peru	6	NI	NI	NI	NI	No
(Miranda-Choque et al., 2012)	16 months	NI	BCGitis	Peru	4	NI	NI	NI	NI	No
(Kalk et al., 2013)	6	Male	Mycobacterium tuberculosis meningitis	South Africa	2	20,000 copies/mL	113 cells/mL (16.5%)	<25 copies/mL	212 (10.1%)	Yes
(Iro et al., 2013)	11	Female	Varicella Zoster Virus	Botswana / UK	2	250,000 copies/mL	6,000 cell/mL	404 copies/mL	30,000/mL	No
(Schwenk et al., 2014)	15	Female	Progressive multifocal leukoencephalopathy	NI	< 48	82,000copies/mL	5 cells/mm3	NI	NI	Yes
(Hassan et al., 2015)	9	Male	Cryptococcosis	South Africa	5	25,000 copies/mL	4 cells/mm3	NI	NI	No
(Hassan et al., 2015)	6	Male	Cryptococcosis	South Africa	2	121,317 copies/mL	42 cells/mm3	400 copies/mL	755 cells/mm3	No
(Hassan et al., 2015)	11	Female	Cryptococcosis	South Africa	14	NI	135 cells/mm3	400 copies/mL	208 cells/mm3	No
(Hassan et al., 2015)	7	Male	Cryptococcosis	South Africa	23.5	NI	10 cells/mm3	400 copies/mL	145 cells/mm3	No
(Nandy and Shah, 2015)	7	Female	Giardiasis	NI	4	NI	158 cells/mm3	NI	NI	No
(Pereira et al., 2016)	13	Female	Opsoclonus-Myoclonus-Ataxia	India	12	28,387	77 cell/mL	165	429 cell/mL	No
(Van Rie et al., 2016)	10 months	NI	Abdominal + pulmonary tuberculosis	South Africa	2	1,700,000	0.11	NI	NI	No
(Van Rie et al., 2016)	8 months	NI	Pulmonary tuberculosis	South Africa	2	9,900,000	0.16	NI	NI	No
(Van Rie et al., 2016)	24 months	NI	Abdominal + pulmonary tuberculosis	South Africa	8	63,000	0.079	400	0.156	No
(Van Rie et al., 2016)	81 months	NI	Abdominal + lymph node + pulmonary tuberculosis	South Africa	2	481,202	0.291	5,608	0.336	No
(Van Rie et al., 2016)	8 months	NI	Pulmonary tuberculosis	South Africa	4	690,000	0.505	NI	NI	No
(Van Rie et al., 2016)	53 months	NI	Pulmonary tuberculosis	South Africa	4	230,000	0.206	NI	NI	No
(Van Rie et al., 2016)	30 months	NI	Pulmonary tuberculosis	South Africa	2	380,000	0.241	NI	NI	No
a Age in years; otherwise in months
b Weeks to onset of IRIS event after ART
c Not informed
References
Bonkowsky, J.L., Christenson, J.C., Nixon, G.W., and Pavia, A.T. (2002). Cerebral aneurysms in a child with acquired immune deficiency syndrome during rapid immune reconstitution. J Child Neurol 17(6), 457-460.
de Carvalho, V.O., Cruz, C.R., Noronha, L., Abagge, K.T., and Lima, H.C. (2010). An inflammatory reaction surrounding molluscum contagiosum as possible manifestation of immune reconstitution inflammatory syndrome in HIV infection. Pediatr Dermatol 27(6), 631-634. doi: 10.1111/j.1525-1470.2010.01322.x.
Dunkley-Thompson, J., Pierre, R.B., Steel-Duncan, J., Palmer, P., Davis, D., Figueroa, J.P., et al. (2008). Bacille Calmette-Guerin lymphadenitis and immune reconstitution syndrome in HIV-infected children on antiretroviral therapy in Jamaica. West Indian Med J 57(3), 302-306.
Fernandes, R.C., de Araujo, L.C., and Medina-Acosta, E. (2009). Reduced rate of adverse reactions to the BCG vaccine in children exposed to the vertical transmission of HIV infection and in HIV-infected children from an endemic setting in Brazil. Eur J Pediatr 168(6), 691-696. doi: 10.1007/s00431-008-0822-y.
Fernandes, R.C., and Medina-Acosta, E. (2010). Complications of bacillus Calmette-Guerin immunization in children treated with highly-active antiretroviral therapy. Int J Infect Dis 14 Suppl 3, e361. doi: 10.1016/j.ijid.2009.11.017.
Gamero, D.B., Garcia, B.S., Conejo, P.R., and Gonzalez-Granado, L.I. (2012). [BCGitis due to immune reconstitution in an HIV positive child]. An Pediatr (Barc) 76(2), 107. doi: 10.1016/j.anpedi.2011.05.018.
Hassan, H., Cotton, M.F., and Rabie, H. (2015). Complicated and protracted cryptococcal disease in HIV-infected children. Pediatr Infect Dis J 34(1), 62-65. doi: 10.1097/INF.0000000000000480.
Hatherill, S., and Flisher, A. (2009). Delirium in children with HIV/AIDS. J Child Neurol 24(7), 879-883.
Hesseling, A.C., Schaaf, H.S., Hanekom, W.A., Beyers, N., Cotton, M.F., Gie, R.P., et al. (2003). Danish bacille Calmette-Guerin vaccine-induced disease in human immunodeficiency virus-infected children. Clin Infect Dis 37(9), 1226-1233.
Innes, S., Schaaf, H.S., and Cotton, M.F. (2009). Cavitation of the Ghon Focus in an Hiv-Infected Infant Who Acquired Tuberculosis after the Initiation of Haart. South Afr J HIV Med 10(1), 44-48.
Iro, M.A., Kirkham, F.J., Macdonald, J.H., Tebruegge, M., Faust, S.N., and Patel, S.V. (2013). Varicella zoster virus central nervous system immune reconstitution inflammatory syndrome presenting in a child. Pediatr Infect Dis J 32(11), 1283-1284.
Kalk, E., Technau, K., Hendson, W., and Coovadia, A. (2013). Paradoxical Mycobacterium tuberculosis Meningitis Immune Reconstitution Inflammatory Syndrome in an HIV-Infected Child. Pediatr Infect Dis J 32(2), 157-162.
Koppel, A., Leonardo-Guerrero, J., Rives, S., Paniagua-Torres, N., Sparrow, C., and Beck-Sague, C.M. (2010). Immune reconstitution inflammatory syndrome due to Mycobacterium bovis Bacillus Calmette-Guerin in infants receiving highly active antiretroviral therapy: a call for universal perinatal rapid HIV testing prior to administration of BCG immunization of neonates. J Trop Pediatr 56(4), 280-283.
Kroidl, A., Huck, K., Weinspach, S., Gudowius, S., Mackenzie, C.R., Oette, M., et al. (2006). Immune reconstitution inflammatory syndrome (IRIS) due to Bacille Calmette Guerin (BCG) in an HIV-positive child. Scand J Infect Dis 38(8), 716-718.
Lankisch, P., Laws, H.J., Wingen, A.M., Borkhardt, A., Niehues, T., and Neubert, J. (2012). Association of nephrotic syndrome with immune reconstitution inflammatory syndrome. Pediatr Nephrol 27(4), 667-669. doi: 10.1007/s00467-011-2069-5.
Miranda-Choque, E., Candela-Herrera, J., E, R.S., Farfan-Ramos, S., and Barriga, A. (2012). [Immune reconstitution syndrome due to BCG in HIV-treated children]. Rev Peru Med Exp Salud Publica 29(4), 498-502.
Nandy, S., and Shah, I. (2015). Immune reconstitution syndrome in a human immunodeficiency virus infected child due to giardiasis leading to shock. J Family Med Prim Care 4(4), 596-597.
Narendran, G., Swaminathan, S., Sathish, S., and Rajasekaran, S. (2006). Immune reconstitution syndrome in a child with TB and HIV. Indian J Pediatr 73(7), 627-629.
Nuttall, J.J., Wilmshurst, J.M., Ndondo, A.P., Yeats, J., Corcoran, C., Hussey, G.D., et al. (2004). Progressive multifocal leukoencephalopathy after initiation of highly active antiretroviral therapy in a child with advanced human immunodeficiency virus infection: a case of immune reconstitution inflammatory syndrome. Pediatr Infect Dis J 23(7), 683-685.
Oberdorfer, P., Washington, C.H., Katanyuwong, K., and Jittamala, P. (2009). Progressive Multifocal Leukoencephalopathy in HIV-Infected Children: A Case Report and Literature Review. Int J Pediatr 2009, 348507.
Pereira, N.M., Shah, I., and Kulkarni, S. (2016). Opsoclonus-myoclonus-ataxia syndrome in an HIV-infected child. Oxf Med Case Reports 2016(10), omw077. doi: 10.1093/omcr/omw077.
Puthanakit, T., Aurpibul, L., Oberdorfer, P., Akarathum, N., Kanjananit, S., Wannarit, P., et al. (2007). Hospitalization and mortality among HIV-infected children after receiving highly active antiretroviral therapy. Clin Infect Dis 44(4), 599-604.
Puthanakit, T., Oberdorfer, P., Akarathum, N., Wannarit, P., Sirisanthana, T., and Sirisanthana, V. (2006a). Immune reconstitution syndrome after highly active antiretroviral therapy in human immunodeficiency virus-infected thai children. Pediatr Infect Dis J 25(1), 53-58.
Puthanakit, T., Oberdorfer, P., Punjaisee, S., Wannarit, P., Sirisanthana, T., and Sirisanthana, V. (2005). Immune reconstitution syndrome due to bacillus Calmette-Guerin after initiation of antiretroviral therapy in children with HIV infection. Clin Infect Dis 41(7), 1049-1052. doi: 10.1086/433177.
Puthanakit, T., Oberdorfer, P., Ukarapol, N., Akarathum, N., Punjaisee, S., Sirisanthana, T., et al. (2006b). Immune reconstitution syndrome from nontuberculous mycobacterial infection after initiation of antiretroviral therapy in children with HIV infection. Pediatr Infect Dis J 25(7), 645-648.
Rabie, H., Lomp, A., Goussard, P., Nel, E., and Cotton, M. (2010). Paradoxical tuberculosis associated immune reconstitution inflammatory syndrome presenting with chylous ascites and chylothorax in a HIV-1 infected child. J Trop Pediatr 56(5), 355-358.
Ramdial, P.K., Sing, Y., Deonarain, J., Bhimma, R., Chotey, N., and Sewram, V. (2011). Pediatric renal cryptococcosis: novel manifestations in the acquired immunodeficiency syndrome era. Int J Surg Pathol 19(3), 386-392. doi: 10.1177/1066896910373923.
Schwenk, H., Ramirez-Avila, L., Sheu, S.H., Wuthrich, C., Waugh, J., Was, A., et al. (2014). Progressive multifocal leukoencephalopathy in pediatric patients: case report and literature review. Pediatr Infect Dis J 33(4), e99-105.
Sharp, M.J., and Mallon, D.F. (1998). Regional Bacillus Calmette-Guerin lymphadenitis after initiating antiretroviral therapy in an infant with human immunodeficiency virus type 1 infection. Pediatr Infect Dis J 17(7), 660-662.
Siberry, G.K., and Tessema, S. (2006). Immune reconstitution syndrome precipitated by bacille Calmette Guerin after initiation of antiretroviral therapy. Pediatr Infect Dis J 25(7), 648-649.
Steenhoff, A.P., Wood, S.M., Shah, S.S., and Rutstein, R.M. (2007). Cutaneous Mycobacterium avium complex infection as a manifestation of the immune reconstitution syndrome in a human immunodeficiency virus-infected child. Pediatr Infect Dis J 26(8), 755-757. doi: 10.1097/INF.0b013e3180618c2d.
Sudjaritruk, T., Sirisanthana, T., and Sirisanthana, V. (2012). Immune reconstitution inflammatory syndrome from Penicillium marneffei in an HIV-infected child: a case report and review of literature. BMC Infect Dis 12, 28. doi: 10.1186/1471-2334-12-28.
Van der Linden, D., Cotton, M., Rabie, H., and McKerrow, N. (2010). Fatal hepatitis B infection despite immunization in an HIV-infected infant: a possible case of vaccine failure and immune reconstitution inflammatory syndrome. J Trop Pediatr 56(5), 351-354.
Van Rie, A., Sawry, S., Link-Gelles, R., Madhi, S., Fairlie, L., Verwey, C., et al. (2016). Paradoxical tuberculosis-associated immune reconstitution inflammatory syndrome in children. Pediatr Pulmonol 51(2), 157-164.
van Toorn, R., Rabie, H., Dramowski, A., and Schoeman, J.F. (2012). Neurological manifestations of TB-IRIS: A report of 4 children. Eur J Paediatr Neurol 16(6), 676-682.
van Toorn, R., Rabie, H., and Warwick, J.M. (2005). Opsoclonus-myoclonus in an HIV-infected child on antiretroviral therapy--possible immune reconstitution inflammatory syndrome. Eur J Paediatr Neurol 9(6), 423-426.
Viani, R.M. (2002). Sarcoidosis and interstitial nephritis in a child with acquired immunodeficiency syndrome: implications of immune reconstitution syndrome with an indinavir-based regimen. Pediatr Infect Dis J 21(5), 435-438.
Wang, M.E., Castillo, M.E., Montano, S.M., and Zunt, J.R. (2009). Immune reconstitution inflammatory syndrome in human immunodeficiency virus-infected children in Peru. Pediatr Infect Dis J 28(10), 900-903. doi: 10.1097/INF.0b013e3181a4b7fa.
